# Supplementary material for: Non-aggregating solvatochromic bipolar benzo[f]quinolines and benzo[a]acridines for organic electronics
Source: Royal Society of Chemistry journal article supplement (doi:10.1039/c2jm31052j), 2012-01-01
Supplement: c2jm31052j.pdf [file c2jm31052j.pdf]

## SUPPORTING INFORMATION

# Non-aggregating Solvatochromic Bipolar Benzo[*f*]quinolines and Benzo[*a*]acridines for Organic Electronics

Atul Goel,<sup>a,\*</sup> Vijay Kumar,<sup>a</sup> Salil Pratap Singh,<sup>a</sup> Ashutosh Sharma,<sup>a</sup> Sattey Prakash,<sup>b</sup>  
Charan Singh,<sup>b</sup> R. S. Anand<sup>b</sup>

<sup>a</sup>Division of Medicinal and Process Chemistry,  
Central Drug Research Institute, CSIR, Lucknow 226001, India  
E-mail: atul\_goel@cdri.res.in

<sup>b</sup>Department of Electrical Engineering,  
Indian Institute of Technology, Kanpur 208016, India.

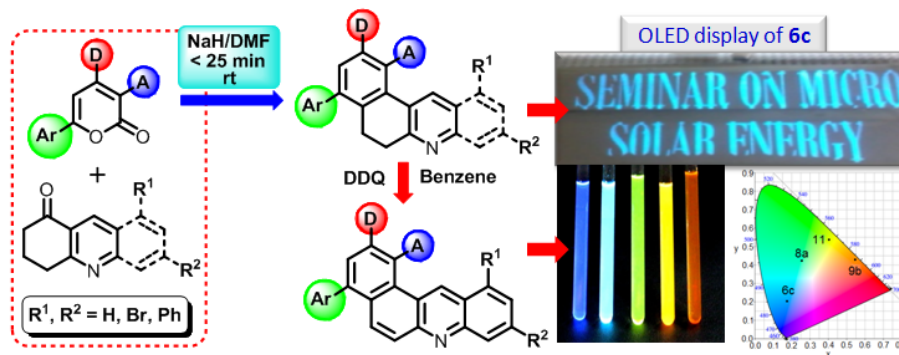

## Table of Contents

|                                                                                                                     |         |
|---------------------------------------------------------------------------------------------------------------------|---------|
| General information                                                                                                 | S2      |
| UV-fluorescence spectra of <b>6b-f</b> , <b>10</b> , and <b>11</b>                                                  | S3-S6   |
| UV & FI Graphs of <b>6a</b> in different solvents                                                                   | S6      |
| Cyclic Voltammograms of <b>6a-f</b> , <b>8a,b</b> , <b>9a</b> , and <b>10</b>                                       | S7-S10  |
| <i>I-L-V</i> characteristics (current density and luminance) of device <b>8a</b> , <b>9b</b> and <b>11</b>          | S10-S11 |
| Copy of <sup>1</sup> H and <sup>13</sup> C NMR of <b>6a-f</b> , <b>8a,b</b> , <b>9a,b</b> , <b>10</b> and <b>11</b> | S11-S23 |

**General:**  $^1\text{H}$  and  $^{13}\text{C}$  NMR spectra were taken at 300 MHz. Chemical shift are reported in parts per million shift ( $\delta$ -value) from  $\text{Me}_4\text{Si}$  ( $\delta$  0 ppm for  $^1\text{H}$ ) or based on the middle peak of the solvent ( $\text{CDCl}_3$ ) ( $\delta$  75.00 ppm for  $^{13}\text{C}$  NMR) as an internal standard. Signal pattern are indicate as s, singlet; d, doublet; dd, double doublet; t, triplet; m, multiplet. Coupling constant ( $J$ ) is given in hertz. Infrared (IR) spectra were recorded in KBr disc and reported in wave number ( $\text{cm}^{-1}$ ). The ESMS were recorded on MICROMASS Quadro-II LCMS system. The HRMS spectra were recorded as EI-HRMS on a JEOL system or as DART-HRMS (recorded as ES+) on a JEOL-AccuTOF JMS-T100LC Mass spectrometer having DART (Direct Analysis in Real Time) source. UV/Vis spectra were obtained using THF as solvent of choice having concentration is about  $10^{-6}$  M. Fluorescence spectra were obtained using THF as solvent of choice, having concentration is about  $10^{-6}$  M. Melting points were measured with melting point apparatus. Cyclic Voltammetry was done using Ag/AgCl as reference electrode. All the reactions were monitored by TLC and visualization was done with UV-light (254 nm).

### UV and PL spectra of (6b-f, 10 and 11)

UV/Vis spectra were obtained with spectrometer with slit width of 1.5, using THF as solvent of choice having concentration  $10^{-6}$  M. Photoluminescence spectra were obtained with slit width of 1.5, using THF as solvent of choice, having concentration  $10^{-6}$  M.

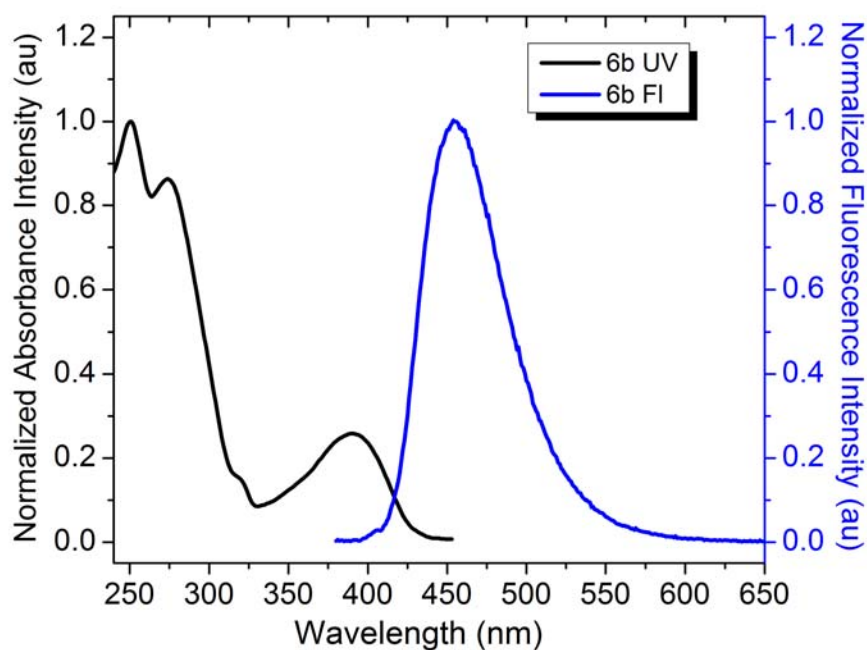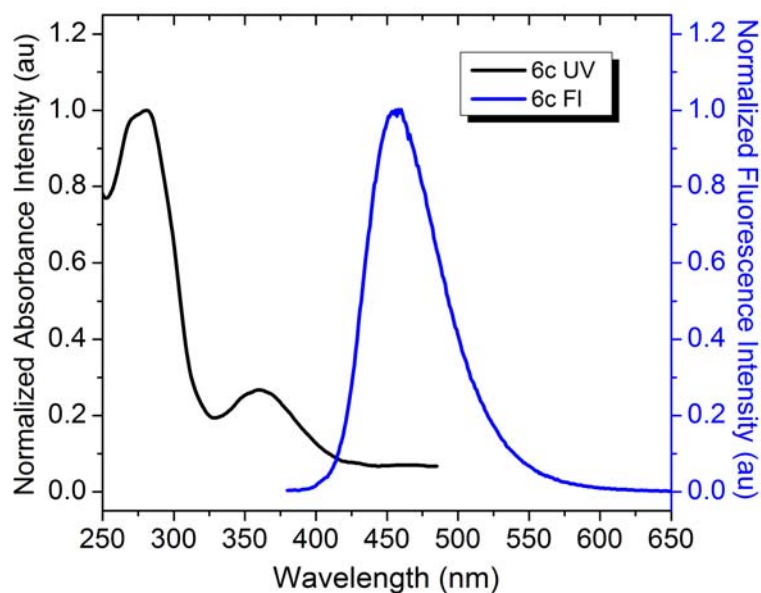

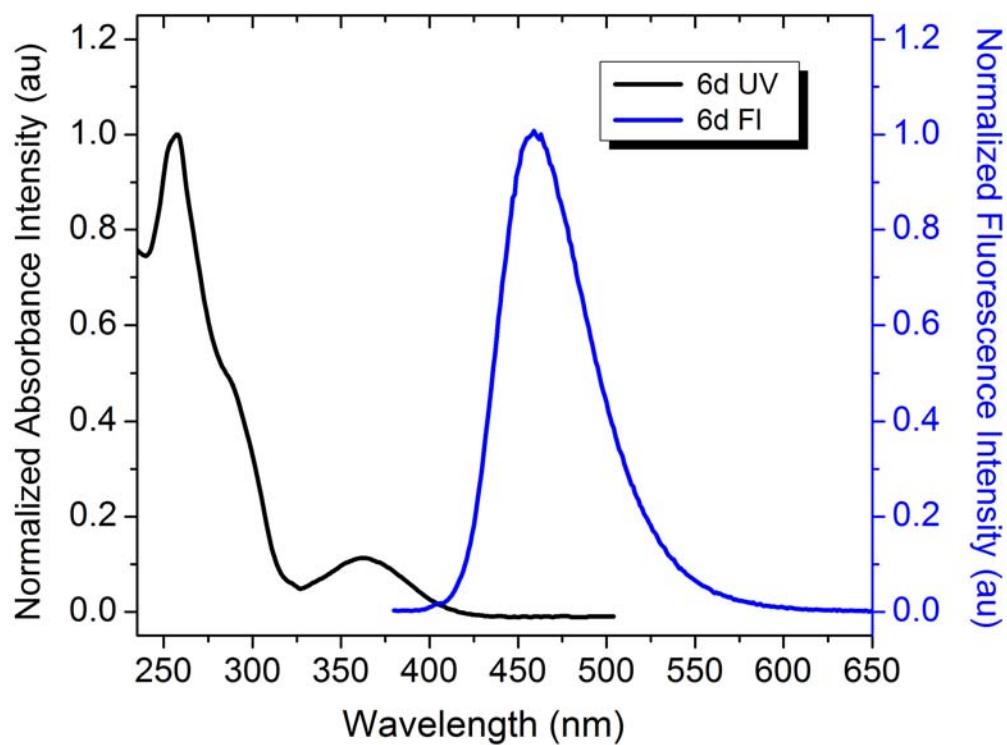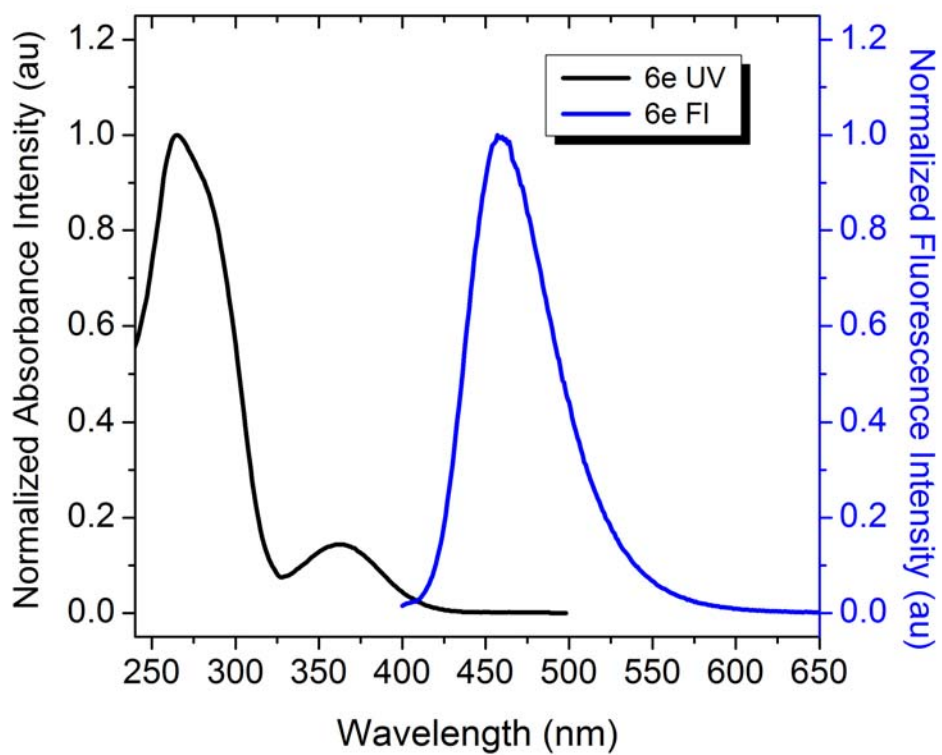

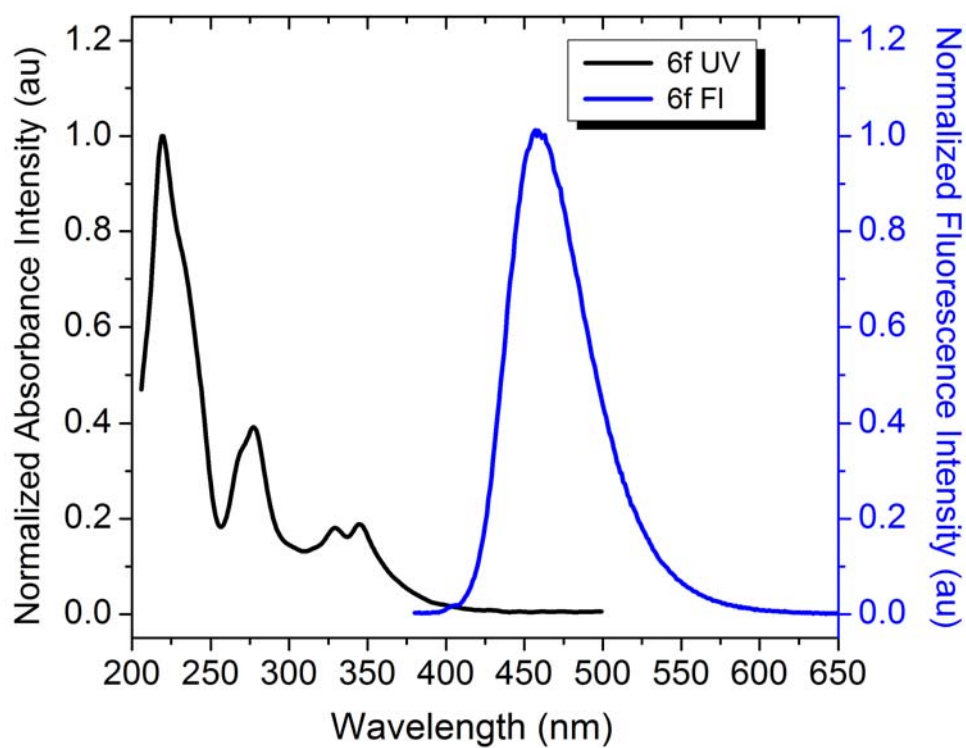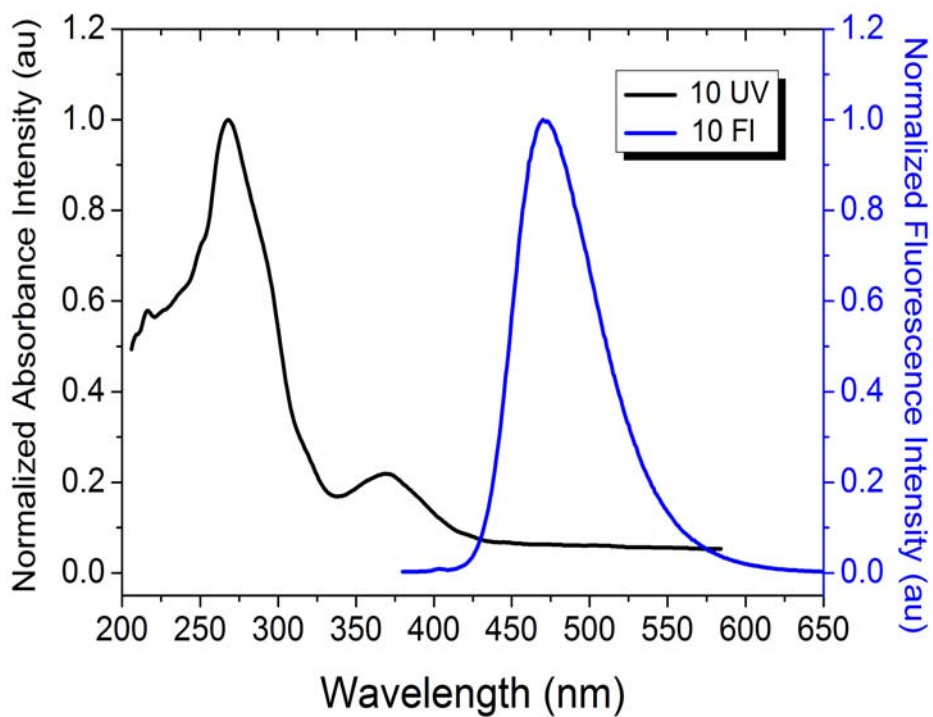

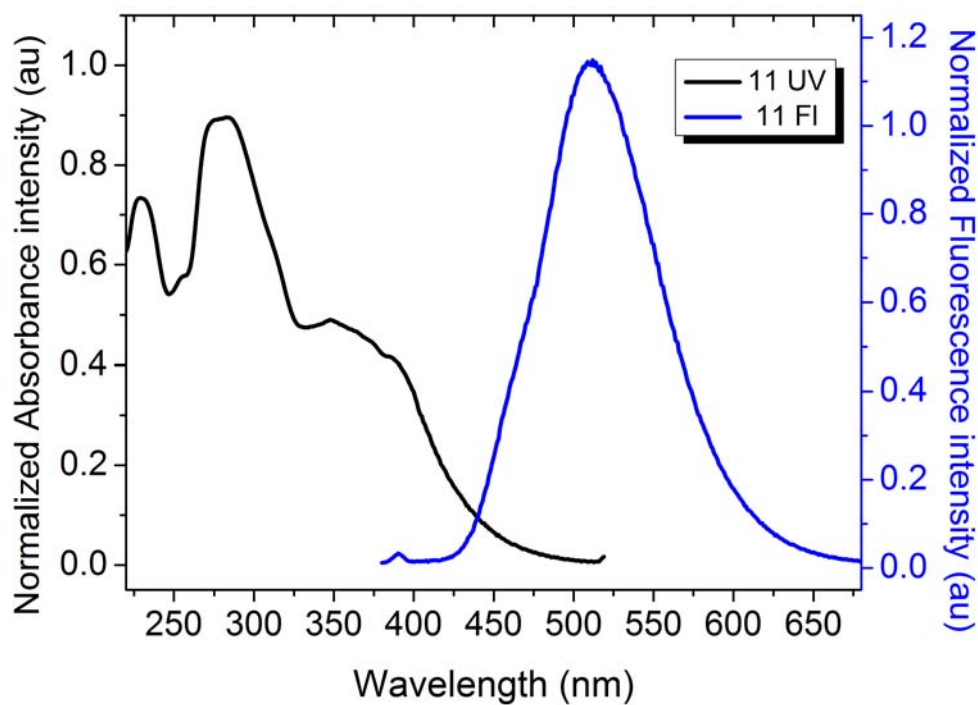

**Figure S1.** UV & FI Graphs of **6b-f**, **10** and **11** in THF

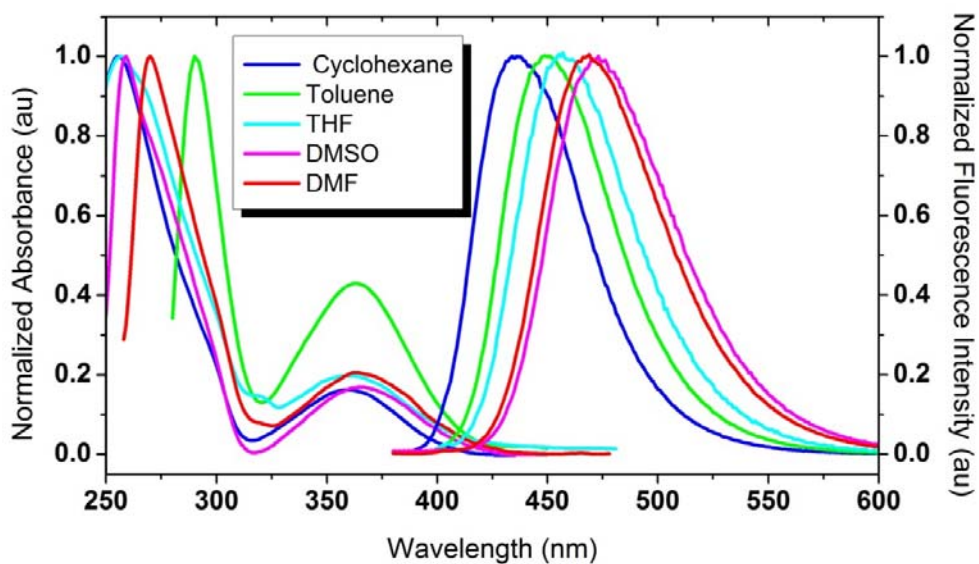

**Figure S2.** UV & FI Graphs of **6a** in different solvents (Inset shows the fluorescence images of solvatofluorochromism upon irradiation of **6a** in different solvents, from left to right: Cyclohexane, Toluene, THF, DMSO, and DMF).



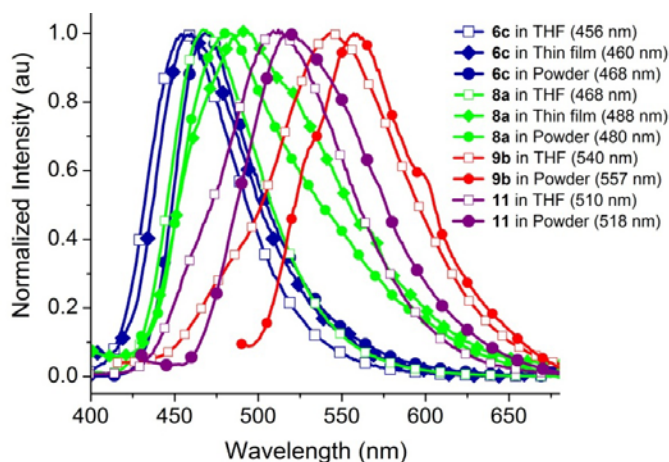

**Fig. S3** Fluorescence spectra of **6c**, **8a**, **9b**, and **11** in powder form, **6c** and **8a** in the thin film

### Electrochemical studies of **6a,b,d,e,f**, **8a,b**, **9a**, and **10**

The electrochemical studies were carried out to ascertain the redox behavior and the HOMO, LUMO energy values of the benzo[*f*]quinolines and benzo[*a*]acridines. Cyclic voltammetric measurements were performed in a three-electrode cell setup using Ag/AgCl as standard electrode and Pt disc as the working electrode, 2mM of N-heterocyclic compounds, and 0.2M of electrolyte tetrabutylammonium hexafluorophosphate ( $\text{Bu}_4\text{NPF}_6$ ) dissolved in *N,N*-dimethylformamide. All the potentials were calibrated with ferrocene ( $\text{Fc}/\text{Fc}^+$ ).

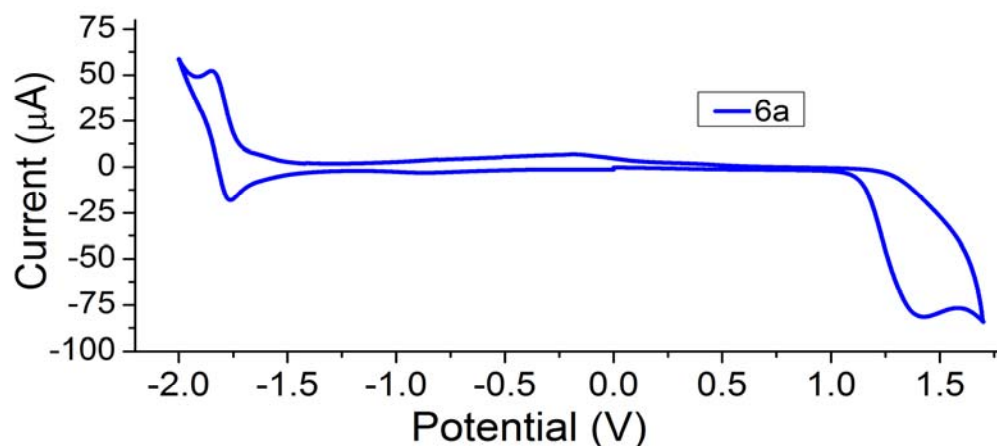

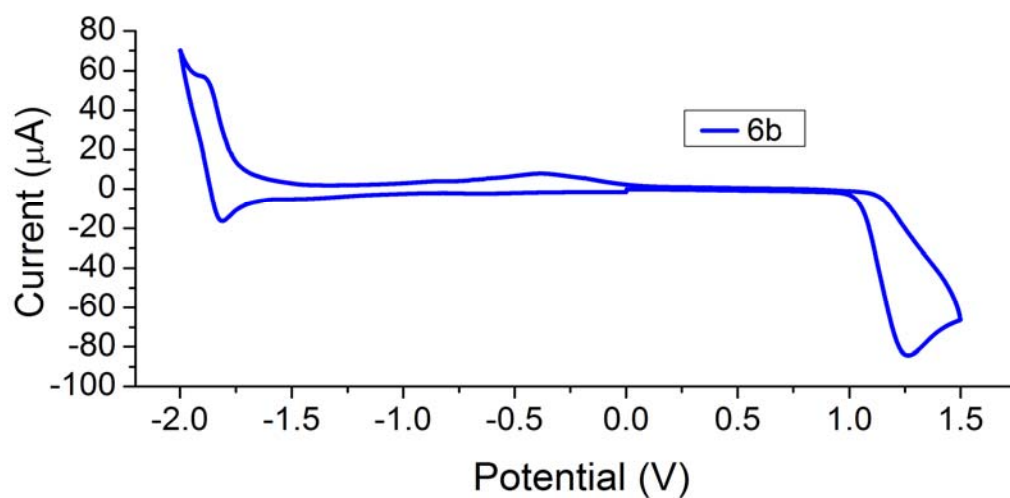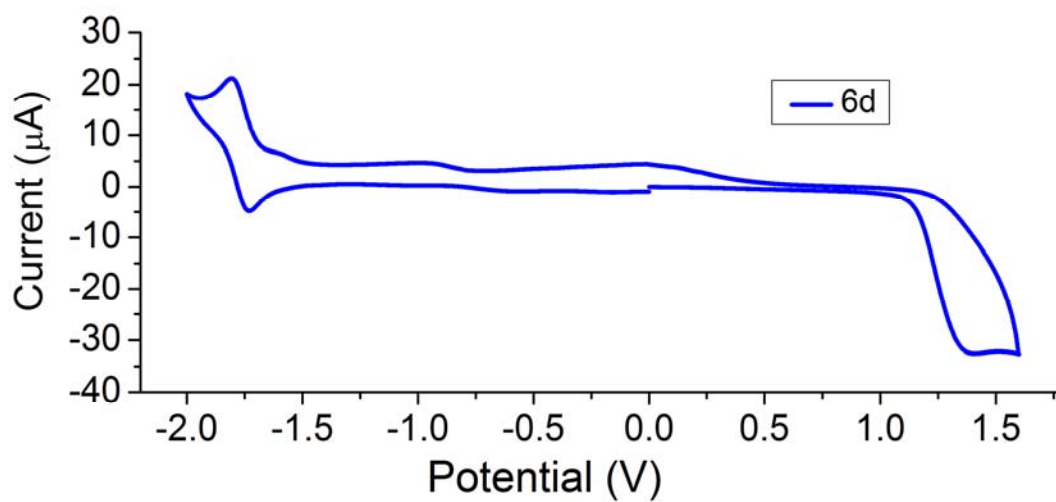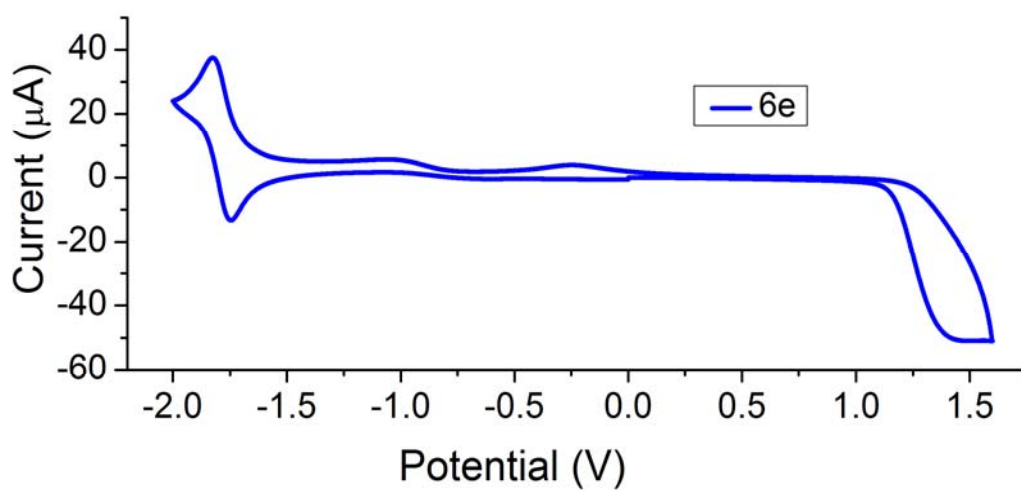



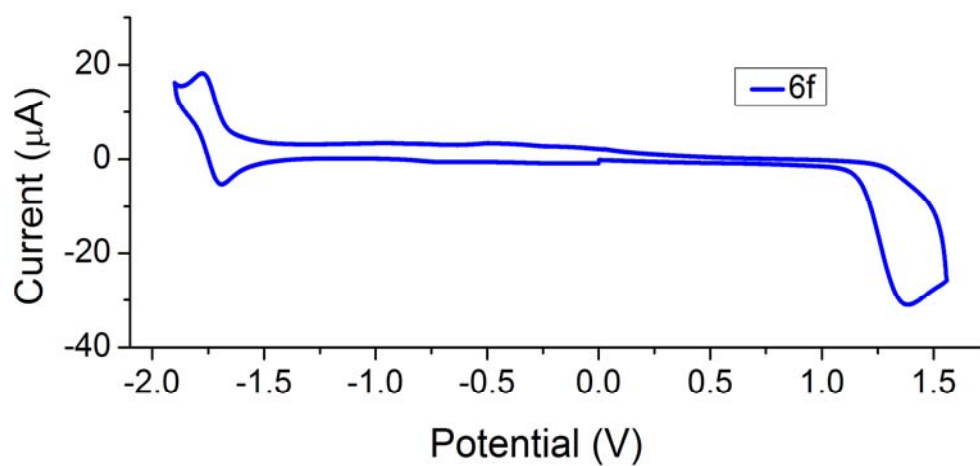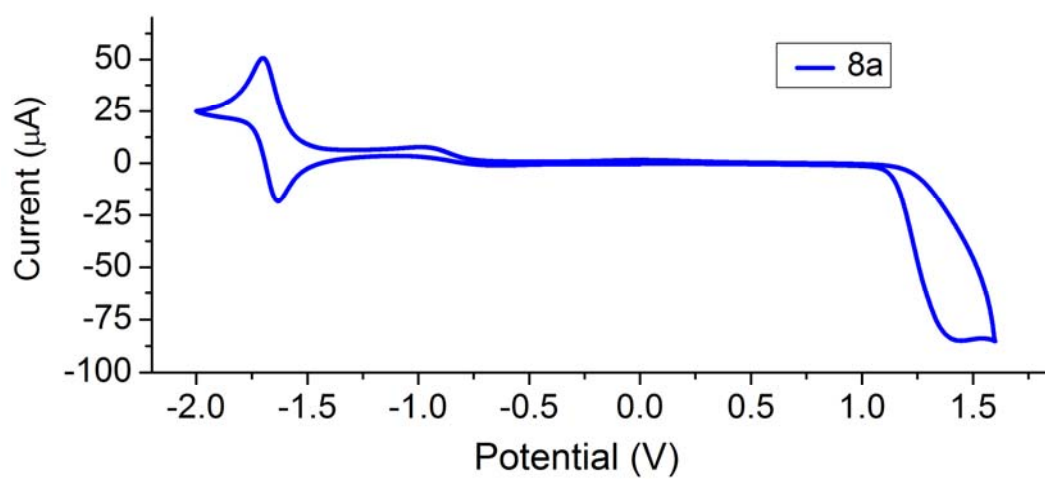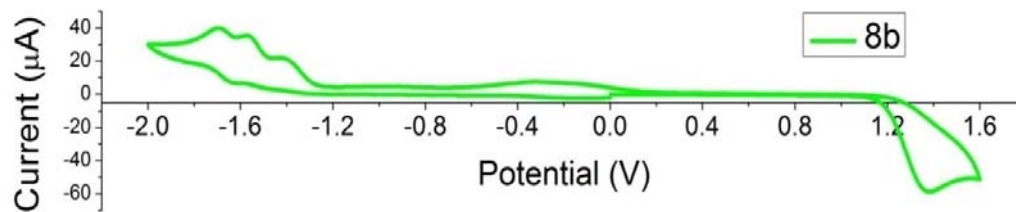

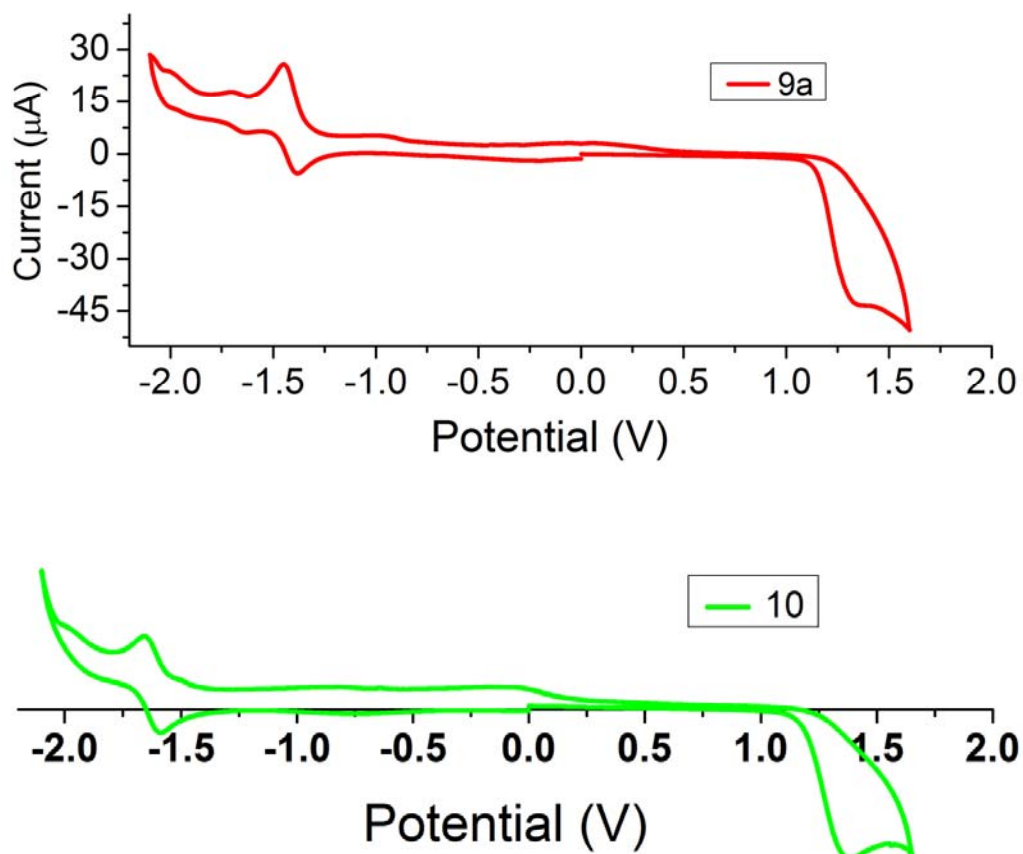

Figure S3. Cyclic Voltammograms of 6a,b,d,e,f, 8a,b, 9a, and 10

**Single layer device characteristics of 6c** (Diode 2) with configuration ITO/PEDOT:PSS(40 nm)/6c (100 nm)/LiF (0.7 nm)/Al (200 nm)

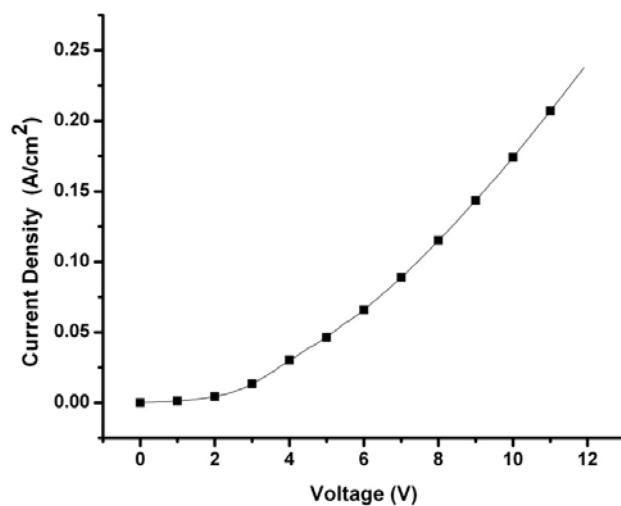

Figure S4.  $I$ - $V$  characteristics of single layer device of 6c

## Device characteristics of of **8a**, **9b**, and **11**

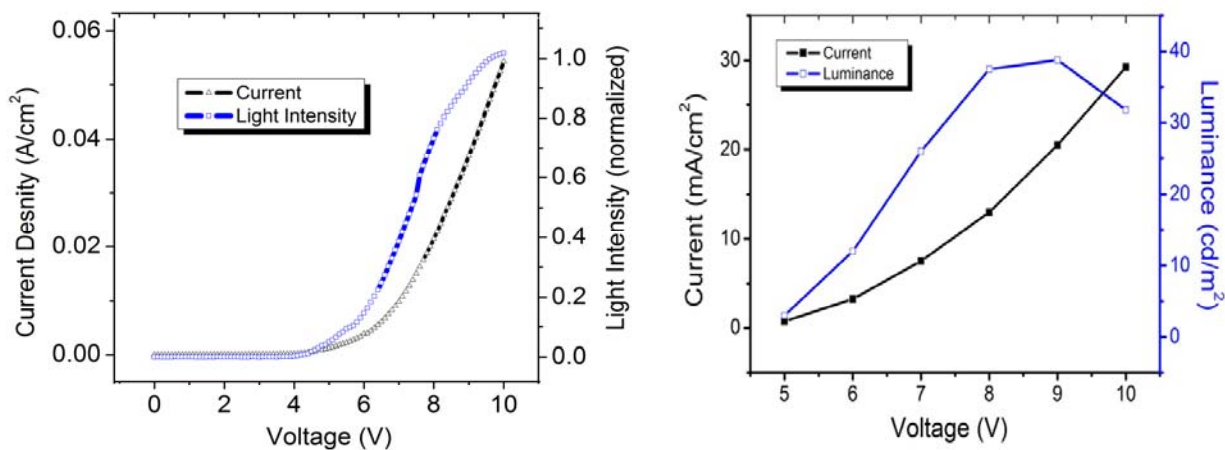

**Figure S4.** *I*-*L*-*V* characteristics of device of **8a**

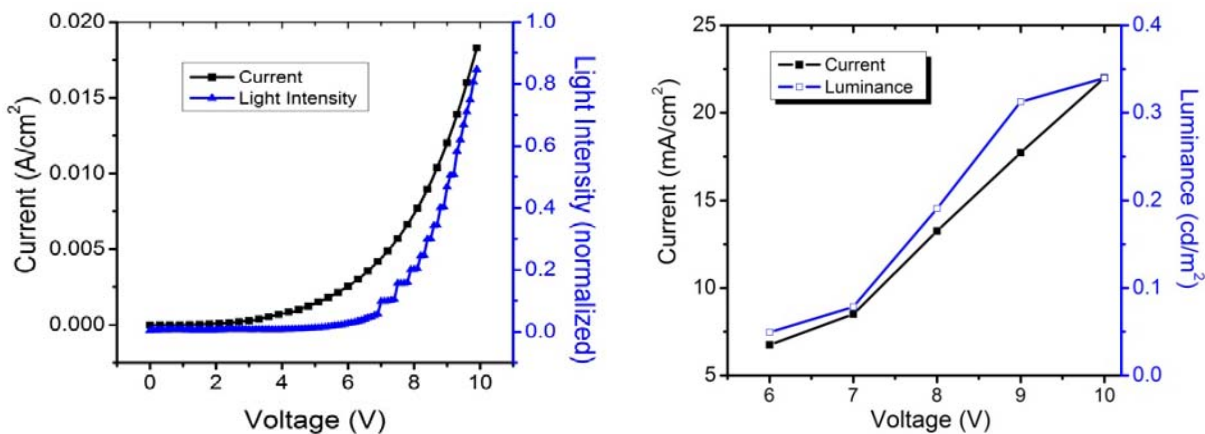

**Figure S5.** *I*-*L*-*V* characteristics of device of **9b**

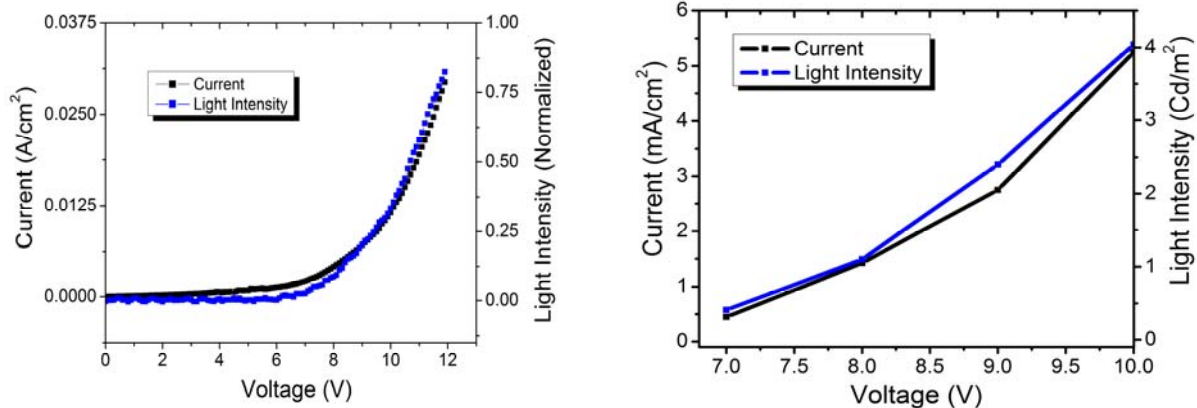

**Figure S6.** *I*-*L*-*V* characteristics of device of **11**

### $^1\text{H}$ and $^{13}\text{C}$ NMR Spectra of compounds

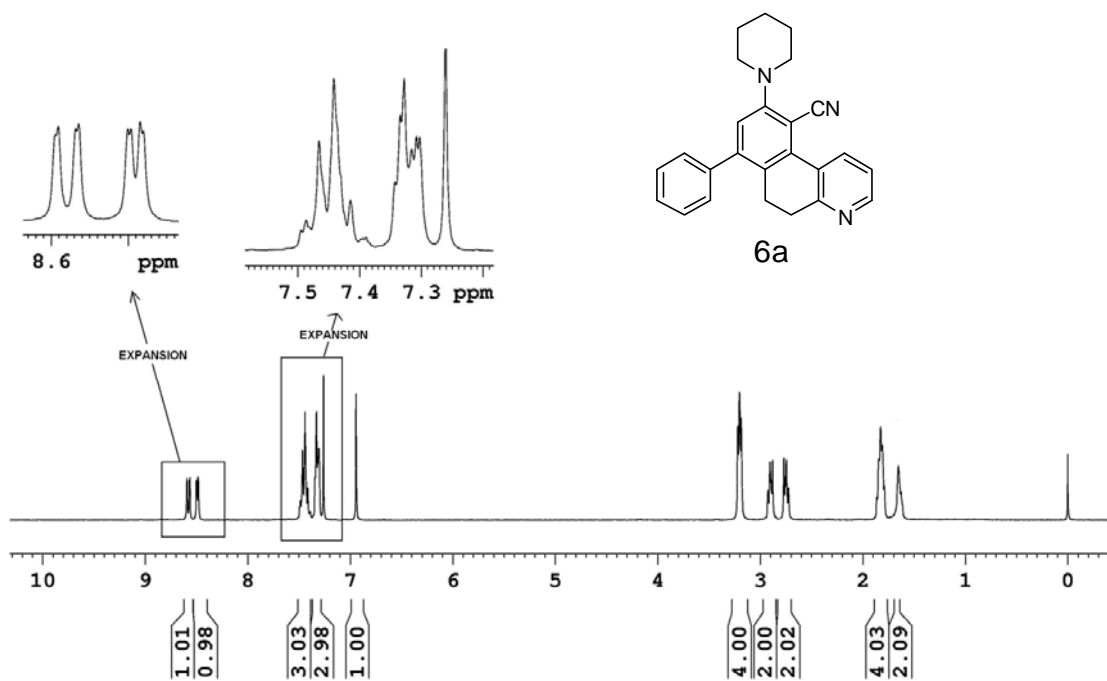

Figure S7.  $^1\text{H}$  NMR spectrum of **6a** in  $\text{CDCl}_3$

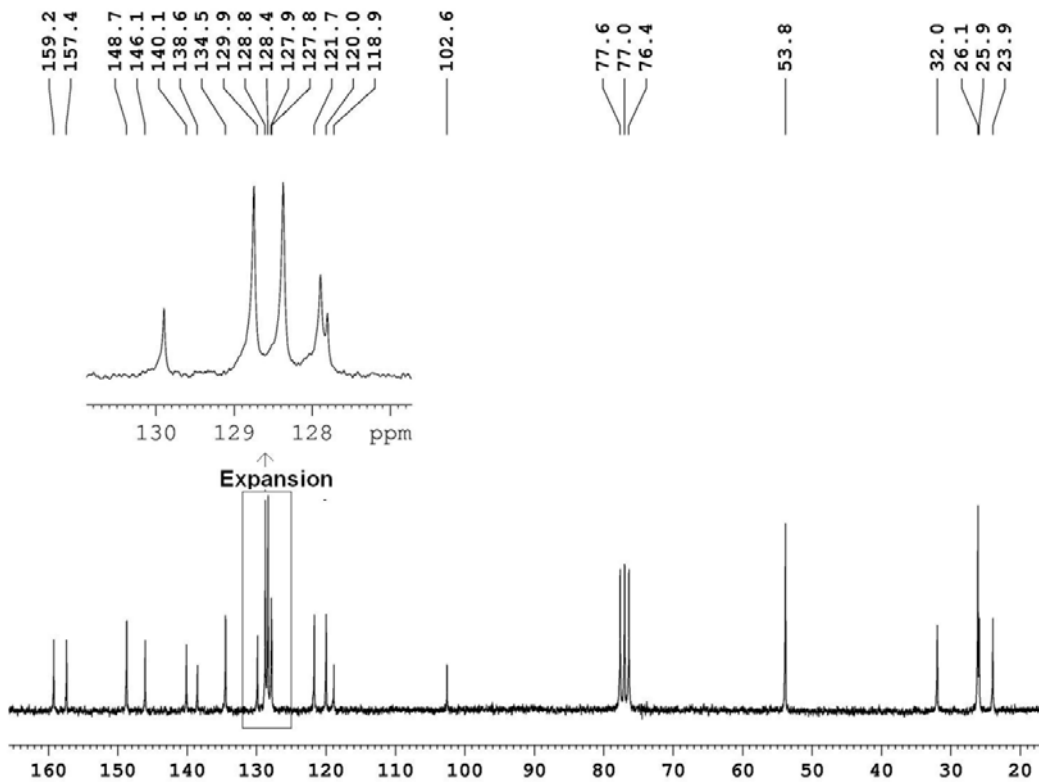

Figure S8.  $^{13}\text{C}$  NMR spectrum of **6a** in  $\text{CDCl}_3$

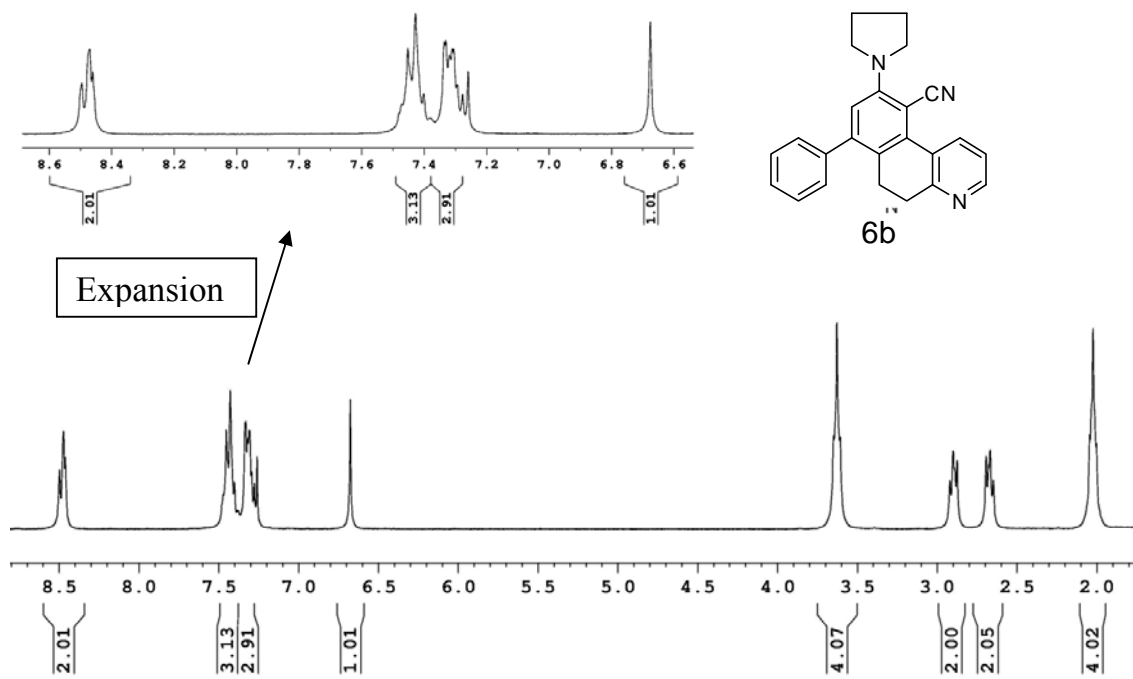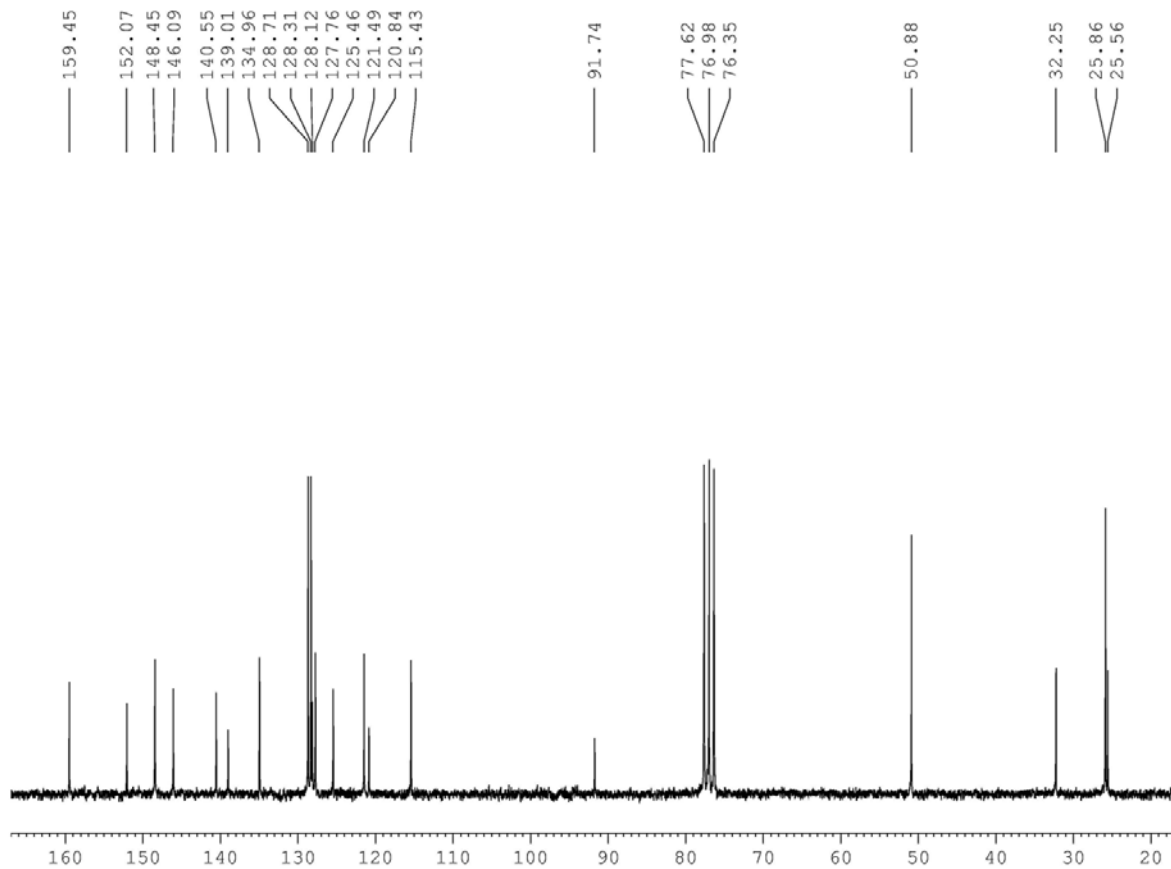

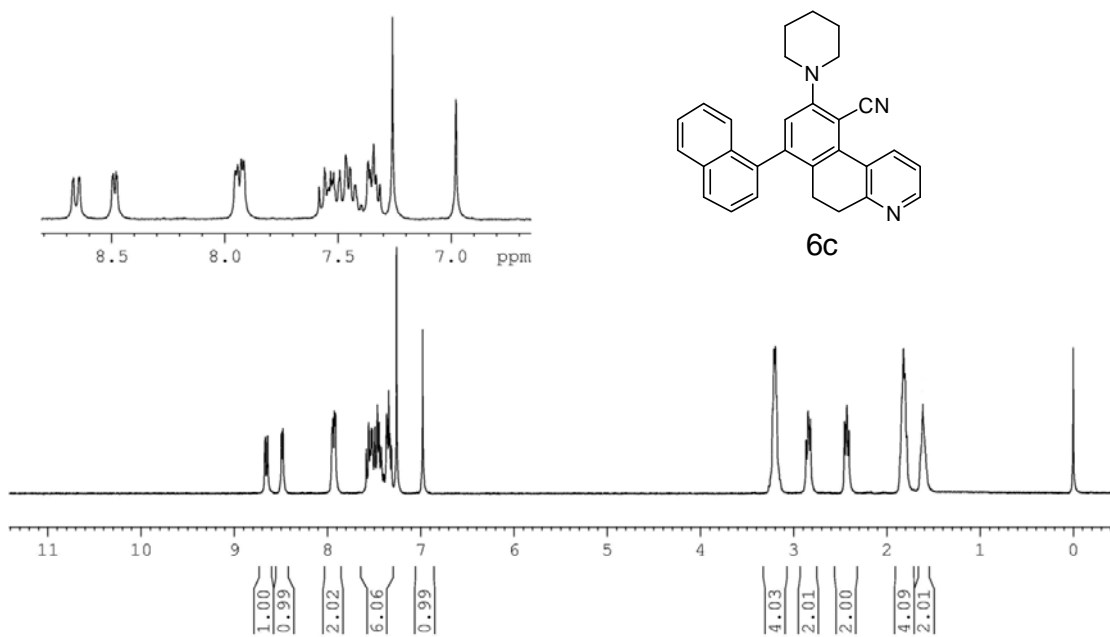

**Figure S11.** <sup>1</sup>H NMR spectrum of **6c** in CDCl<sub>3</sub>

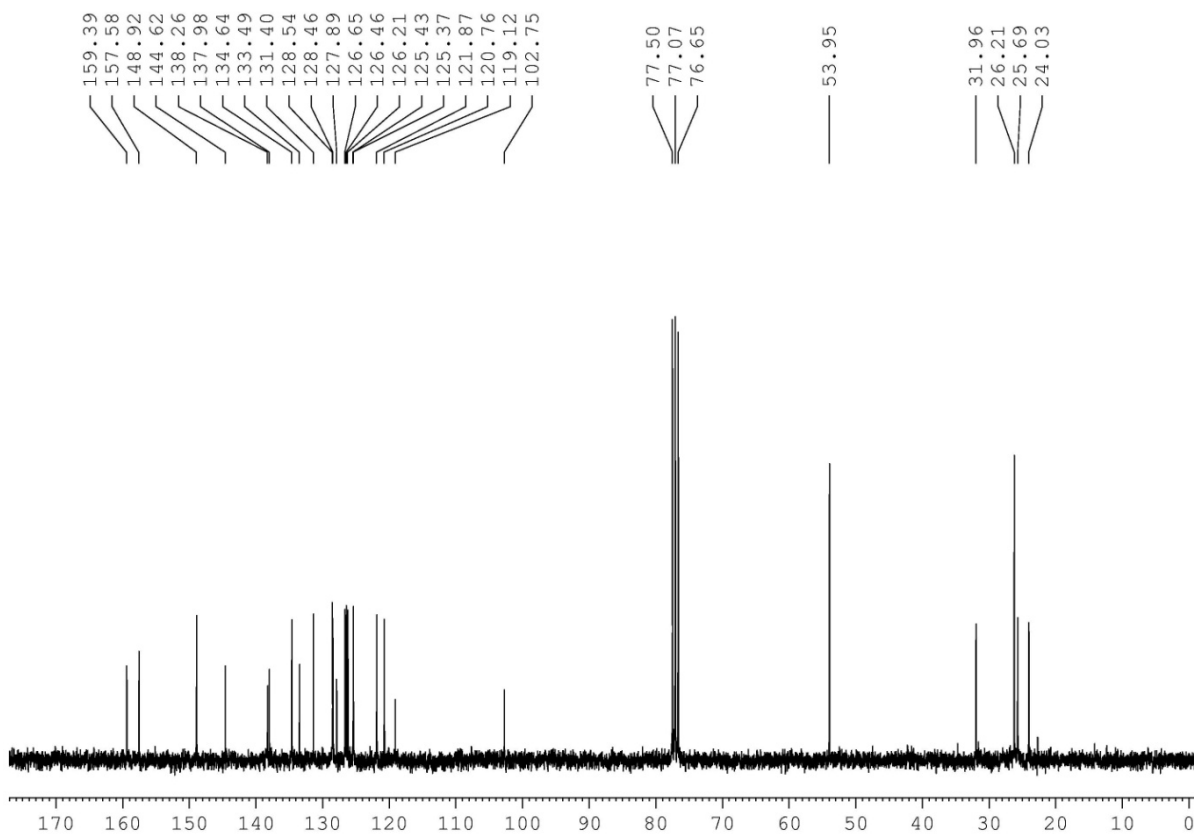

**Figure S12.** <sup>13</sup>C NMR spectrum of **6c** in CDCl<sub>3</sub>



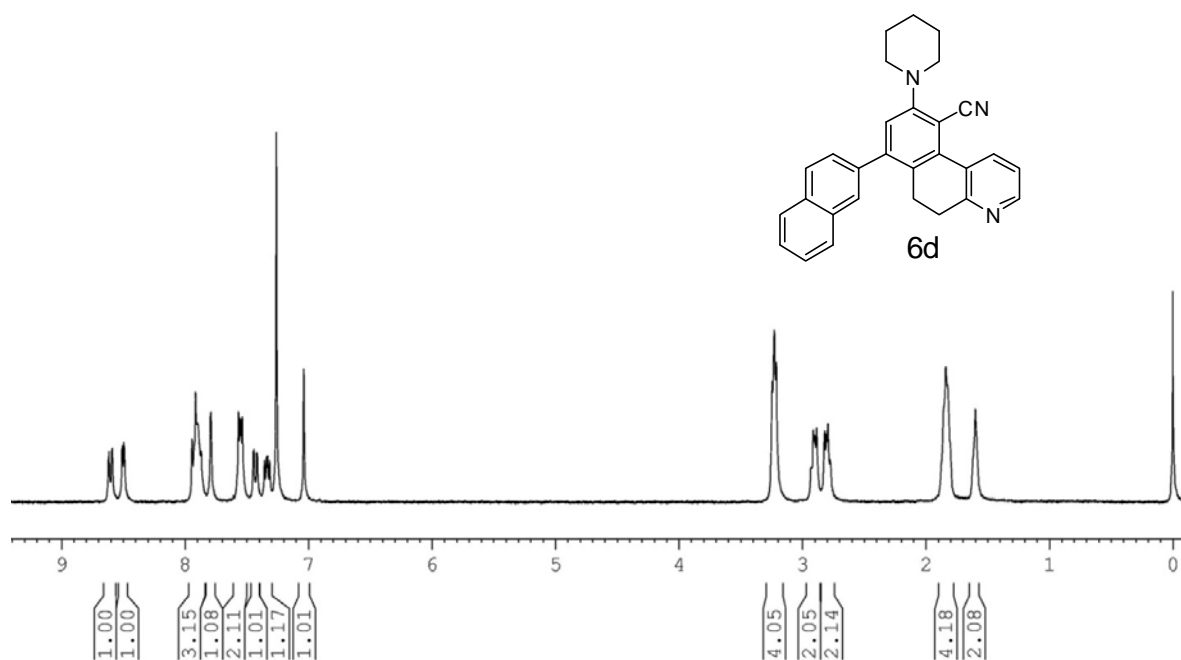

**Figure S13.** <sup>1</sup>H NMR spectrum of **6d** in CDCl<sub>3</sub>

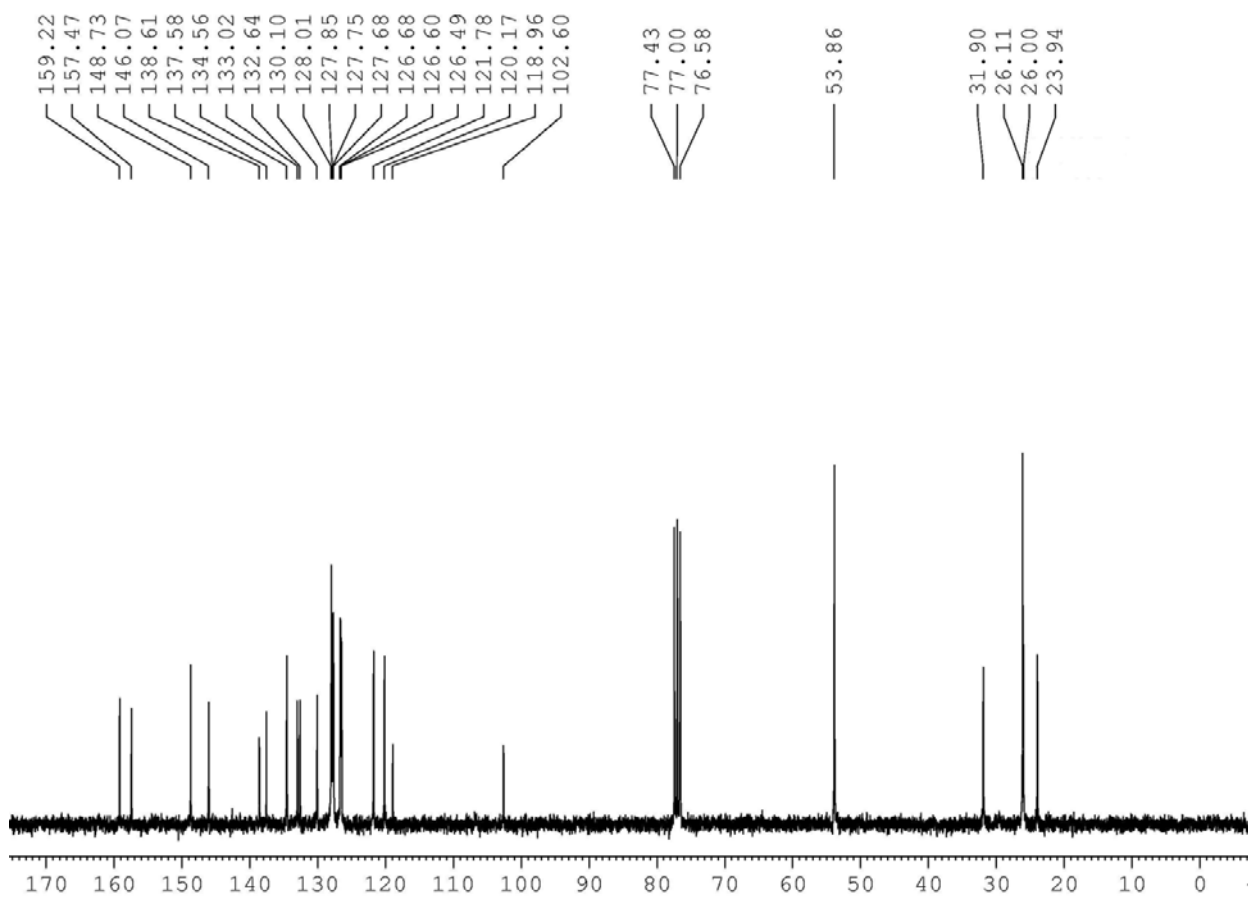

**Figure S14.** <sup>13</sup>C NMR spectrum of **6d** in CDCl<sub>3</sub>

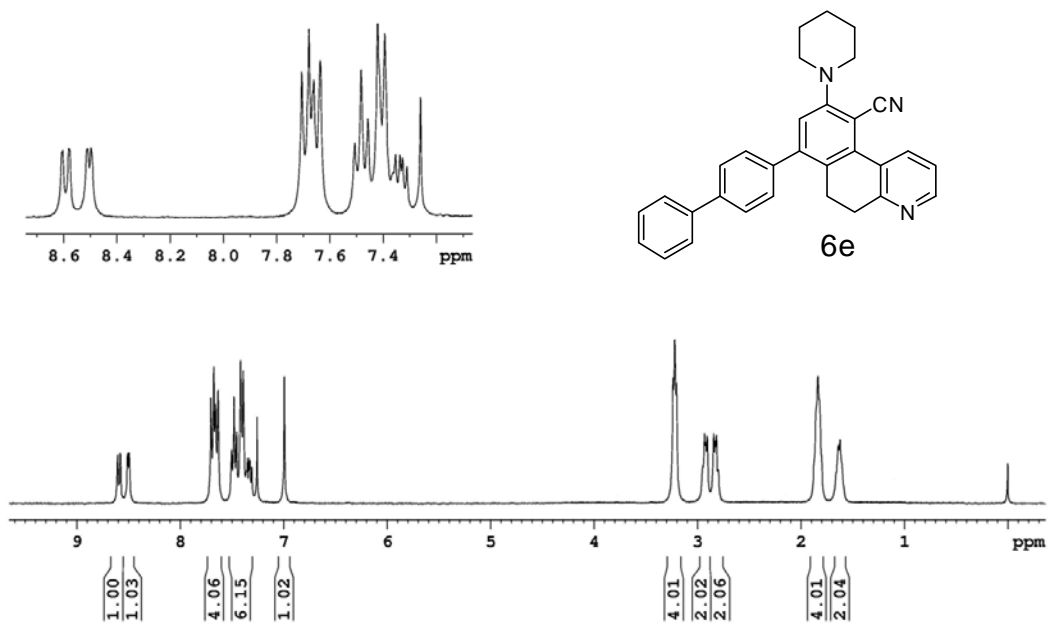

**Figure S15.**  $^1\text{H}$  NMR spectrum of **6e** in  $\text{CDCl}_3$

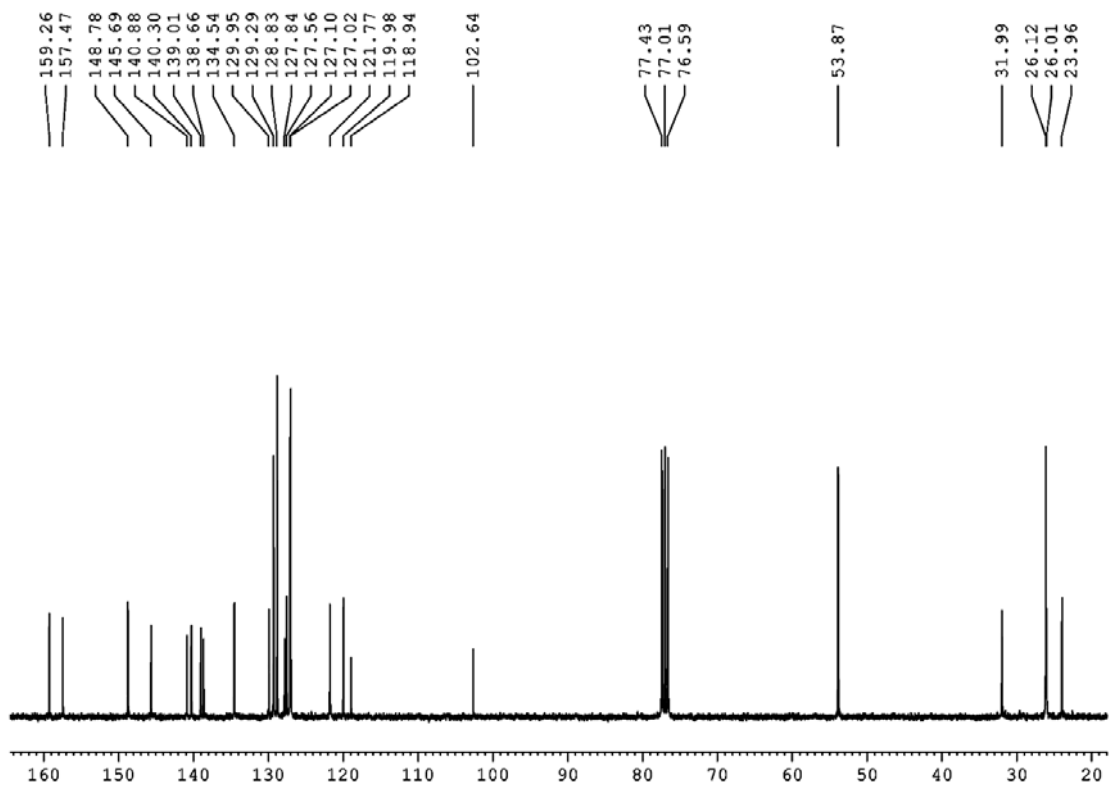

**Figure S16.**  $^{13}\text{C}$  NMR spectrum of **6e** in  $\text{CDCl}_3$

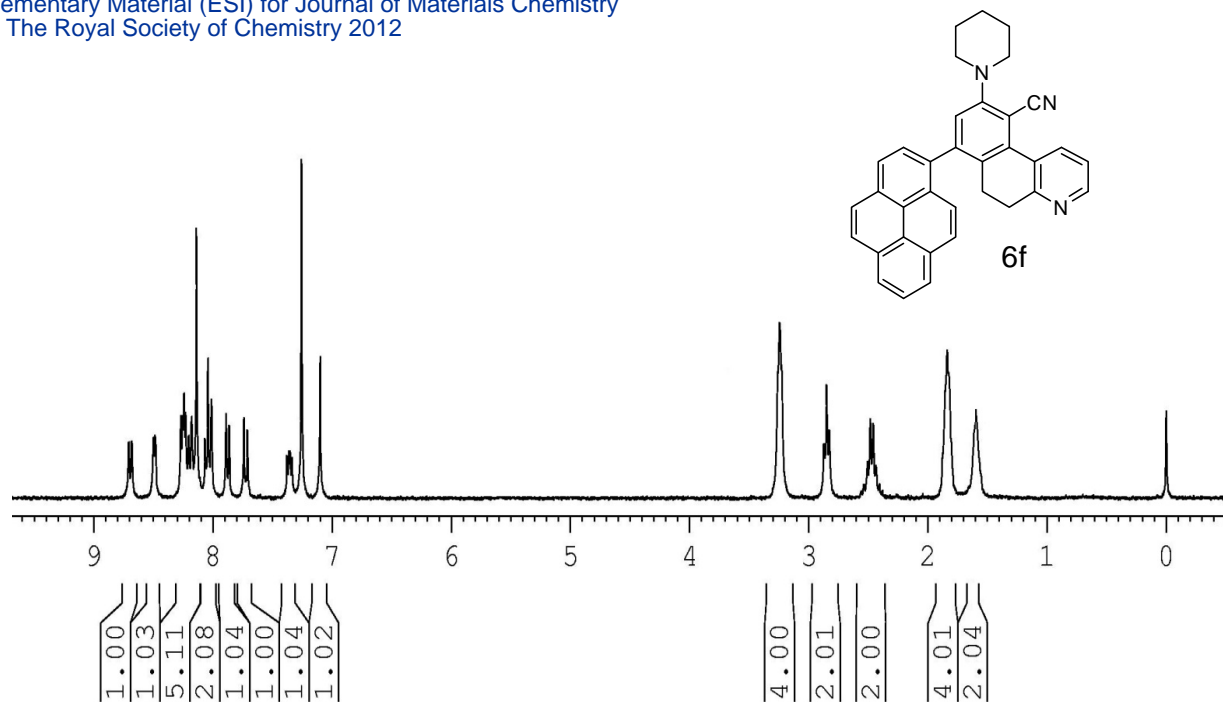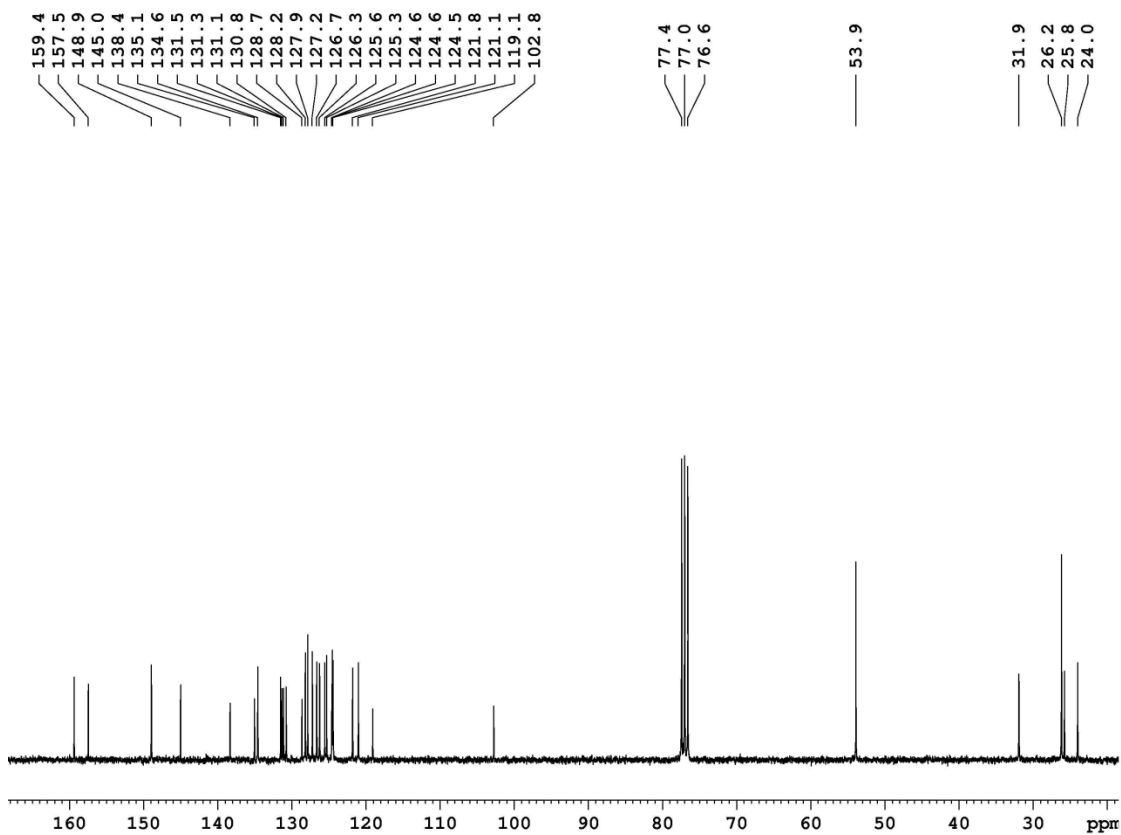

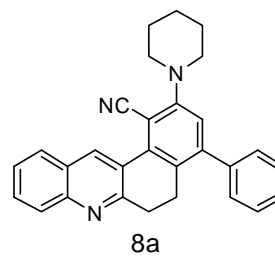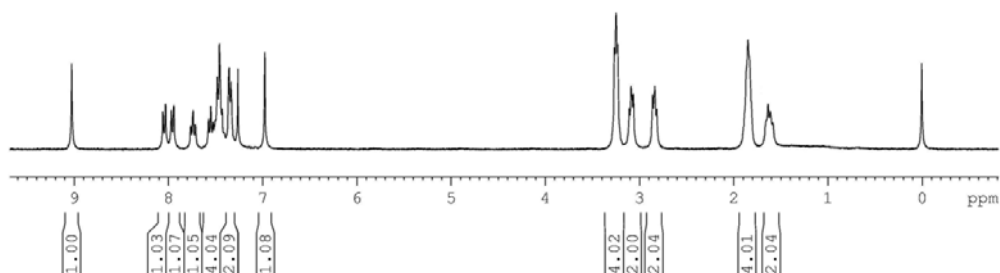

Figure S19. <sup>1</sup>H NMR spectrum of **8a** in CDCl<sub>3</sub>

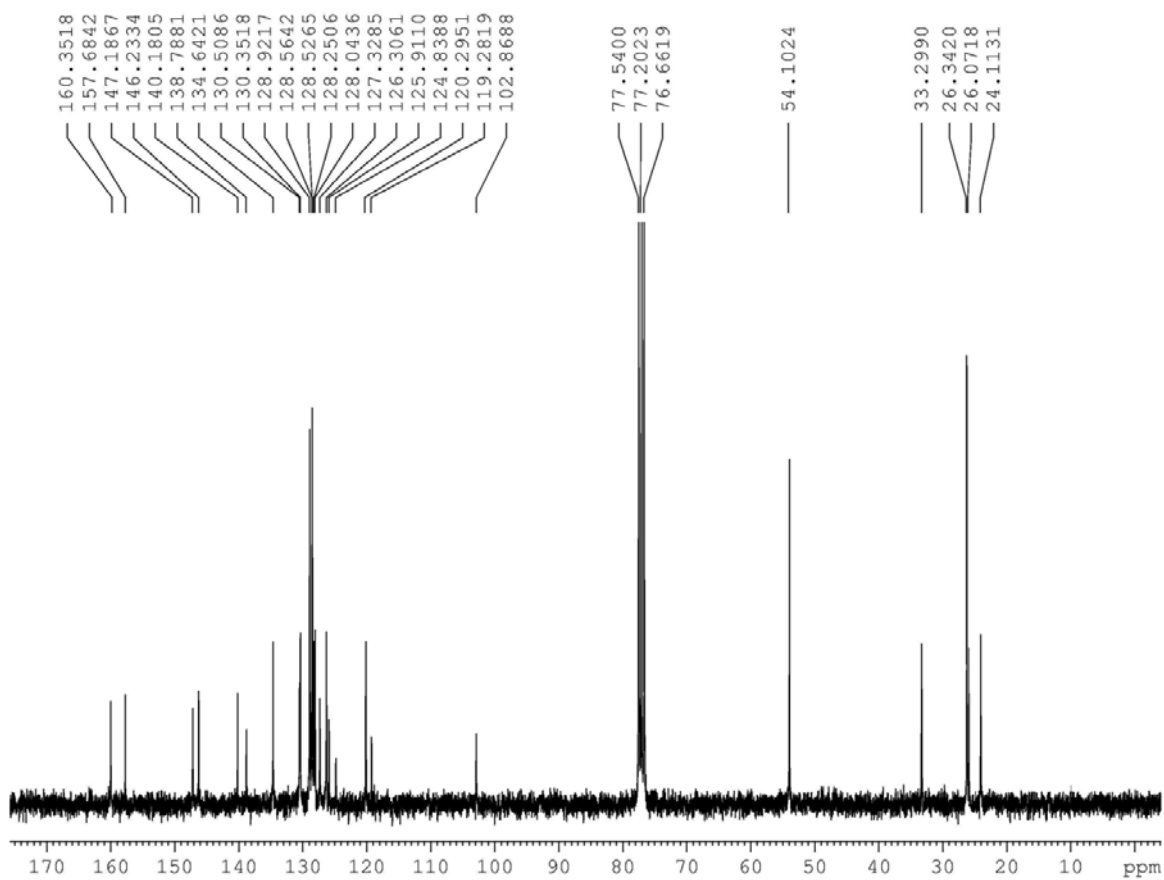

Figure S20. <sup>13</sup>C NMR spectrum of **8a** in CDCl<sub>3</sub>

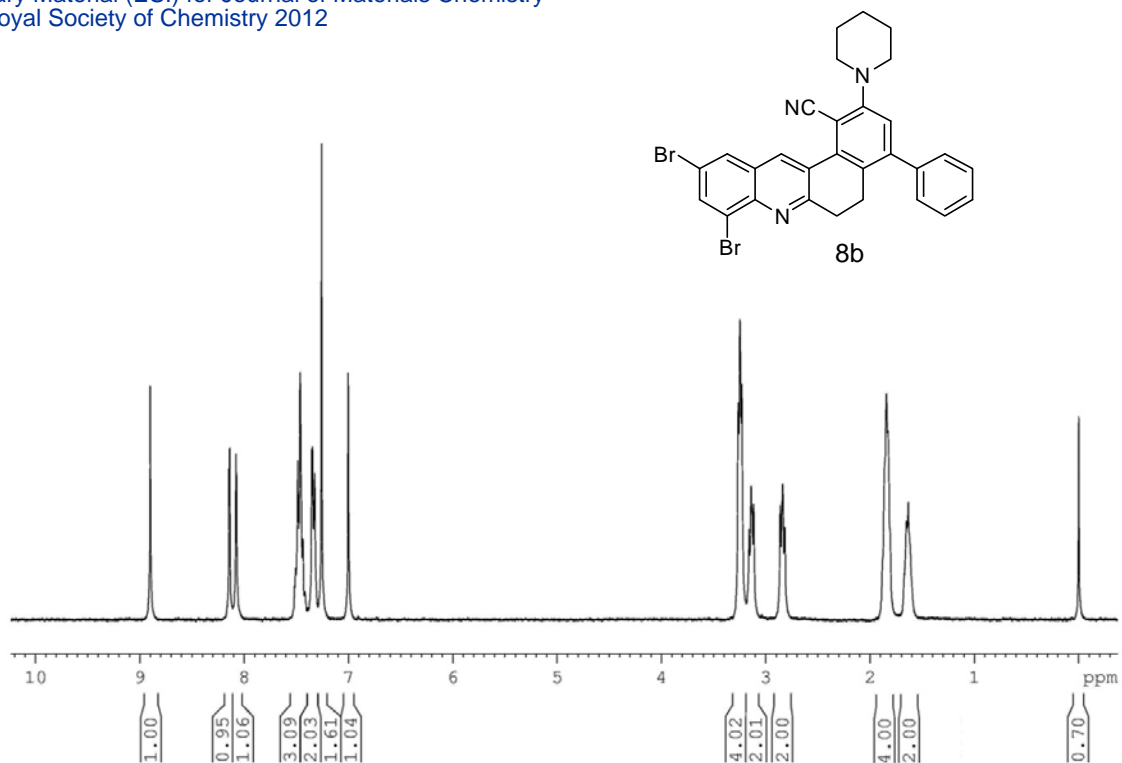

Figure S21. <sup>1</sup>H NMR spectrum of **8b** in CDCl<sub>3</sub>

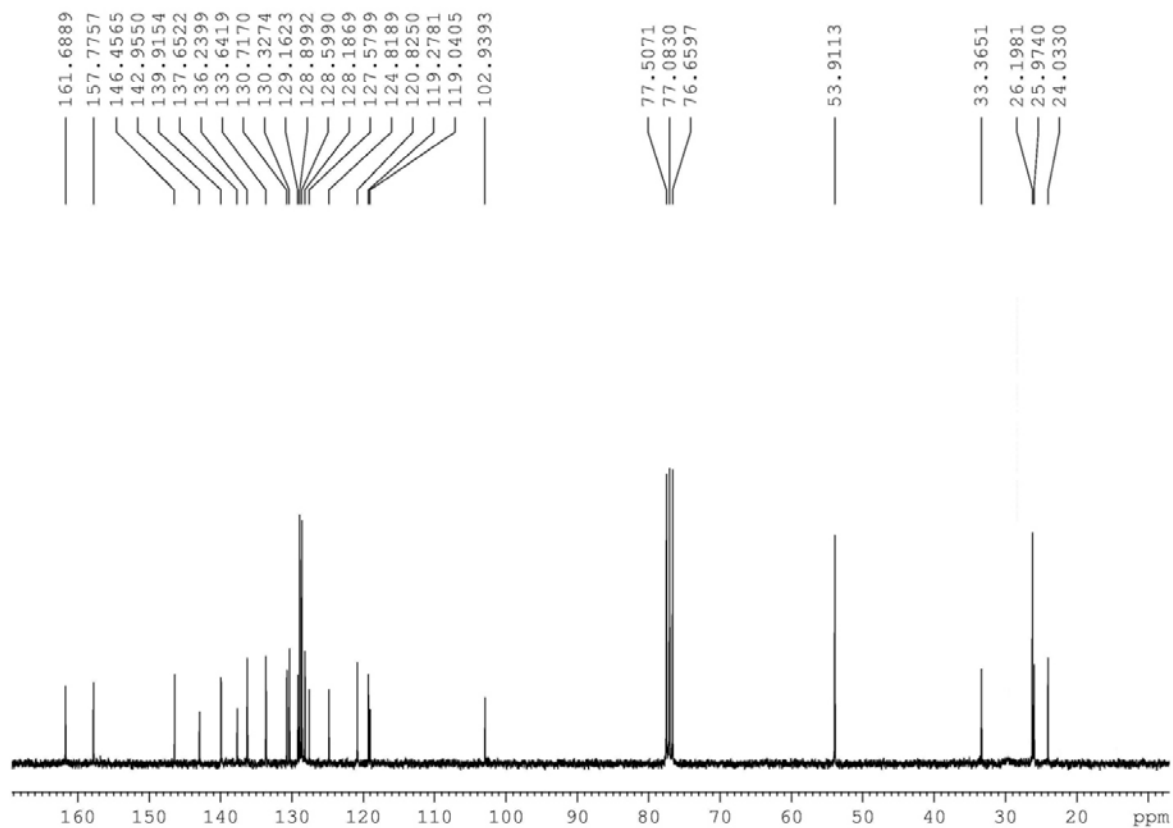

Figure S22. <sup>13</sup>C NMR spectrum of **8b** in CDCl<sub>3</sub>

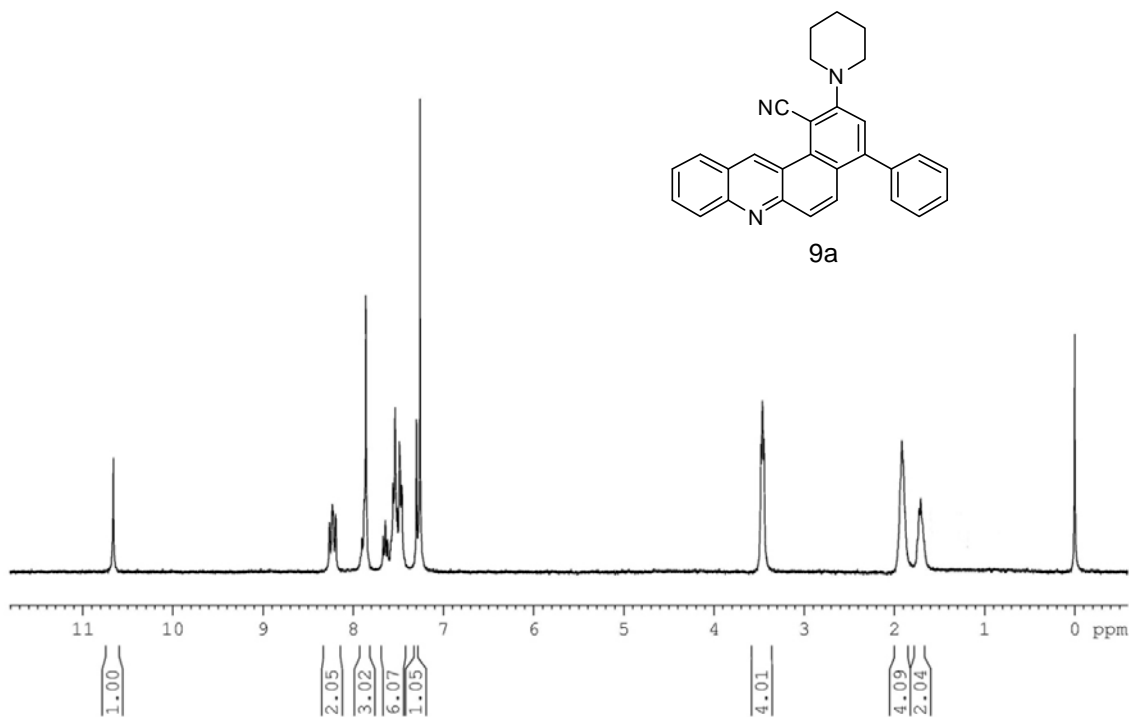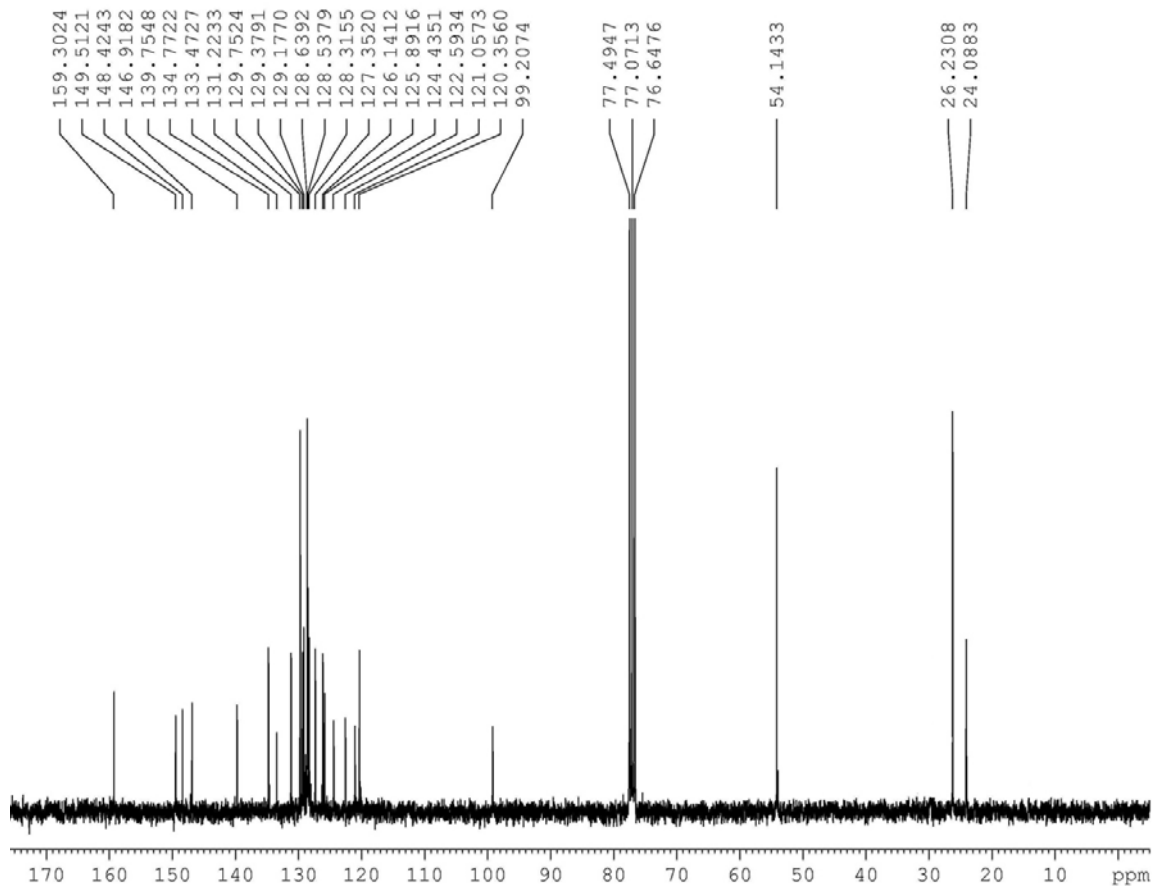



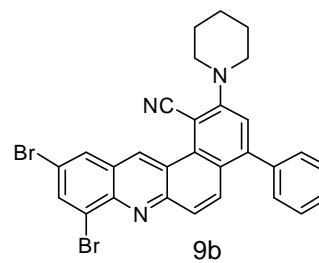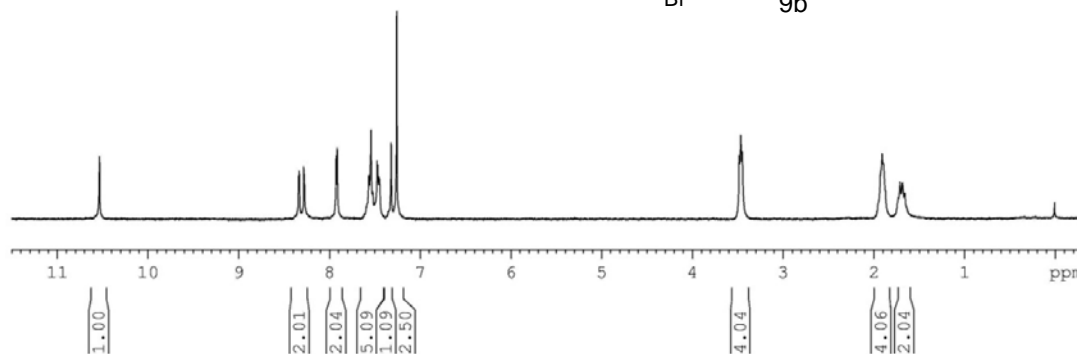

**Figure S25.**  $^1\text{H}$  NMR spectrum of **9b** in  $\text{CDCl}_3$

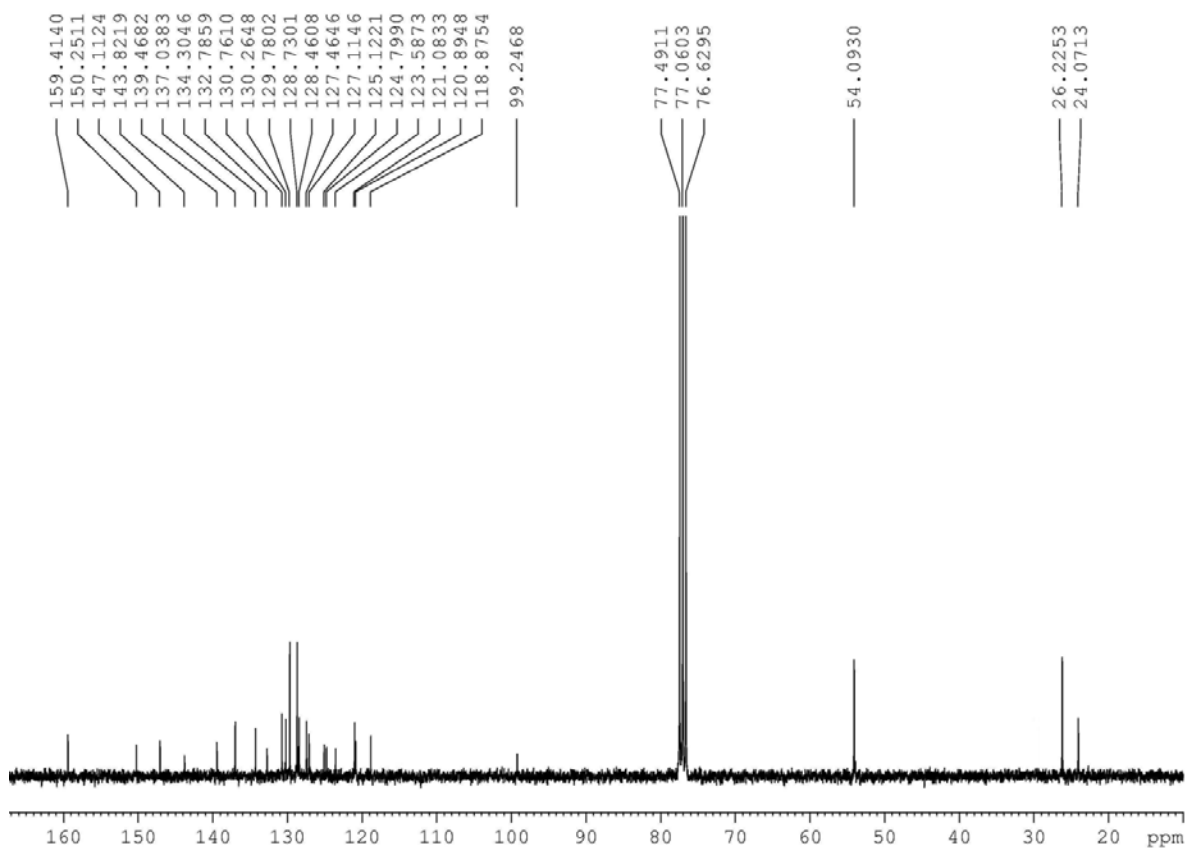

**Figure S26.**  $^{13}\text{C}$  NMR spectrum of **9b** in  $\text{CDCl}_3$

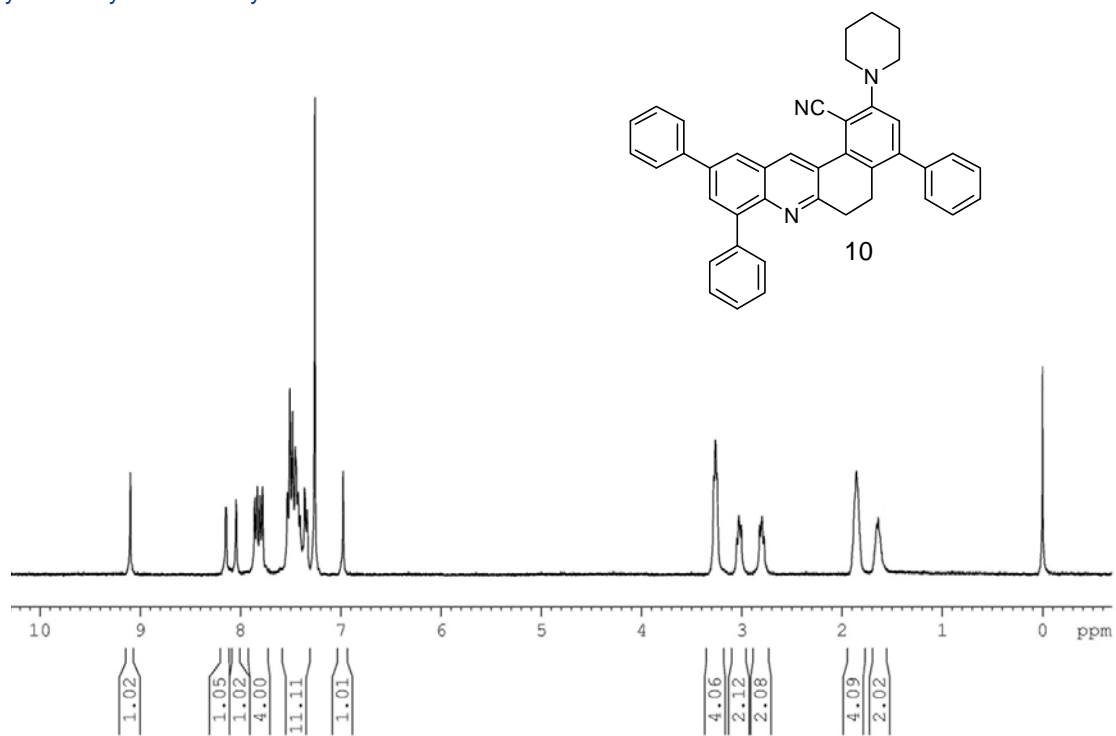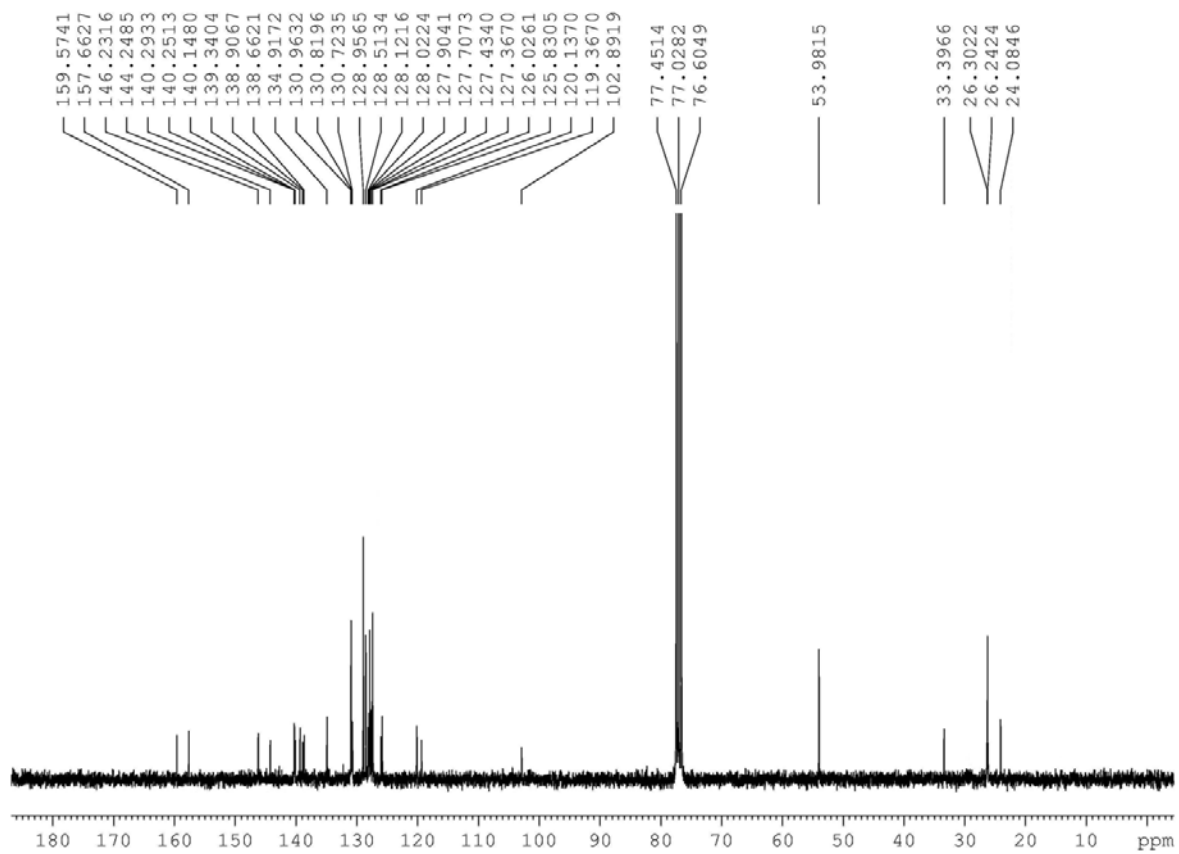

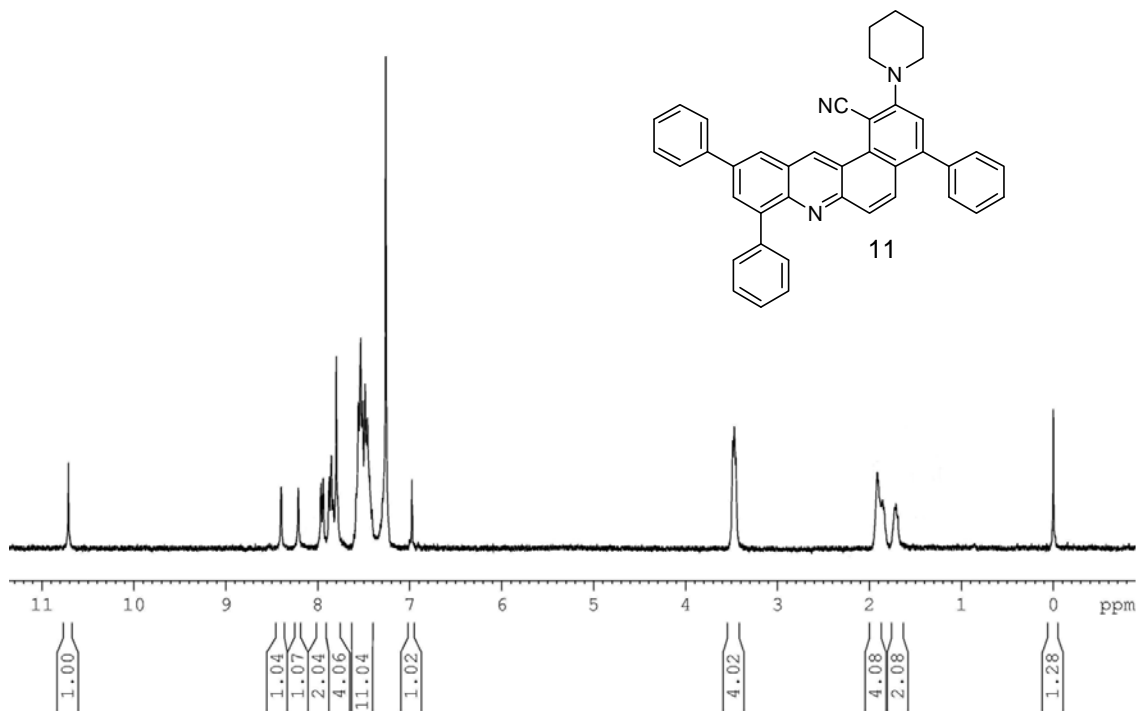

**Figure 29.** <sup>1</sup>H NMR spectrum of **11** in CDCl<sub>3</sub>

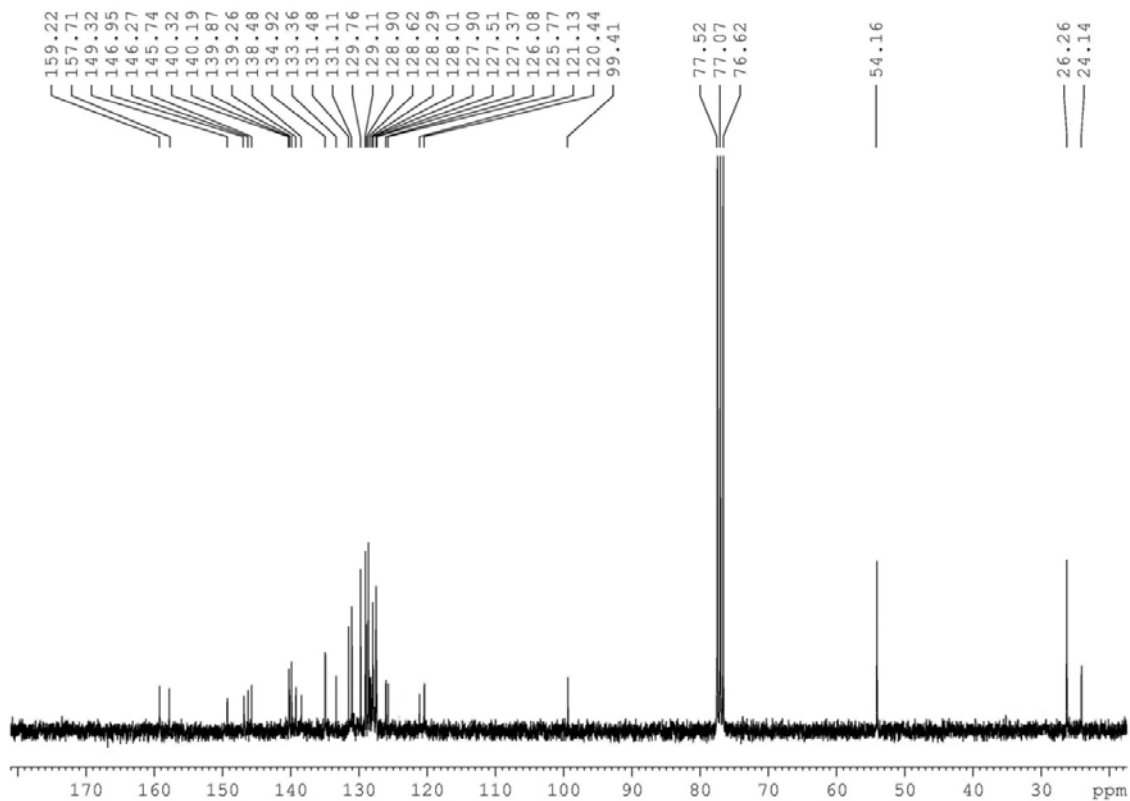

**Figure S30.** <sup>13</sup>C NMR spectrum of **11** in CDCl<sub>3</sub>
